# Supplementary material for: Prevention of ion migration in lead halide perovskites upon plugging the anion vacancies with PbSe islands
Source: Royal Society of Chemistry journal article supplement (doi:10.1039/d4cc01280a), 2024-01-01
Supplement: d4cc01280a1.pdf [file d4cc01280a1.pdf]

## Electronic Supplementary Information

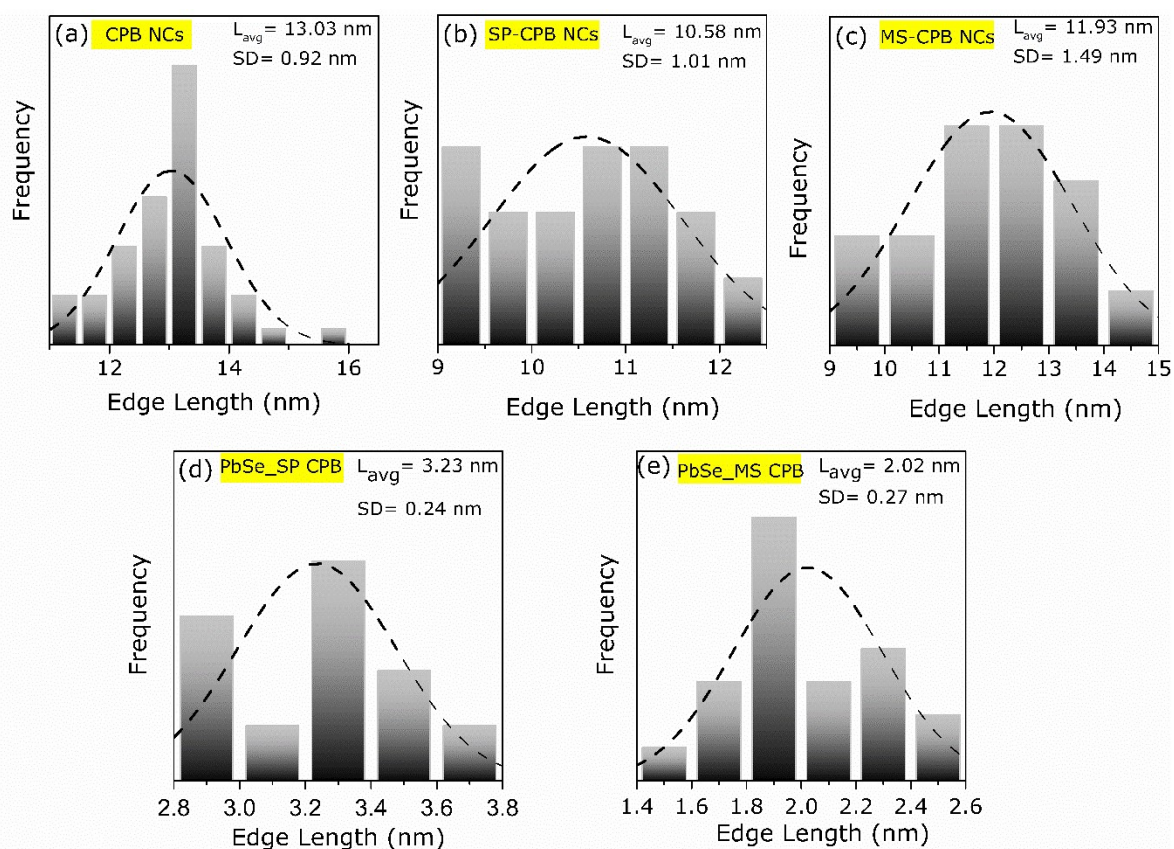

**Figure S1.** Histograms corresponding to (a) pristine CPB NCs, (b) SP-CPB NCs, and (c) MS-CPB NCs, showing size distribution of CPB in all cases; (d), (e) histograms showing size distribution of PbSe particles in SP-CPB and MS-CPB NCs, respectively.

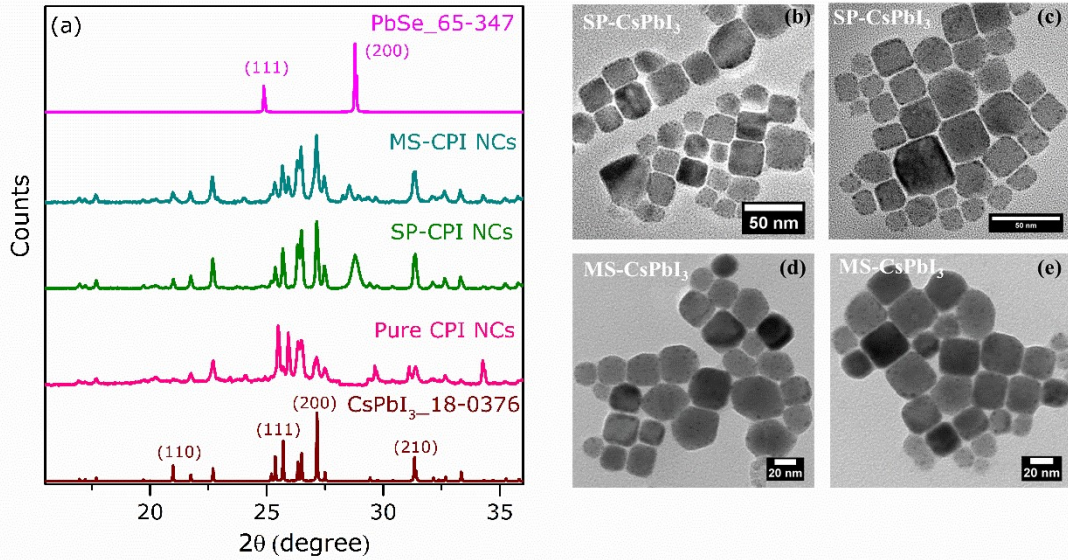

**Figure S2.** (a) XRD pattern of CPI NCs and MS/SP-CPI along with their reference pattern; TEM images of (b), (c) SP-CPI NCs; (d), (e) MS-CPI NCs, illustrating cubic morphology of CPI NCs, decorated with dot like PbSe particles.

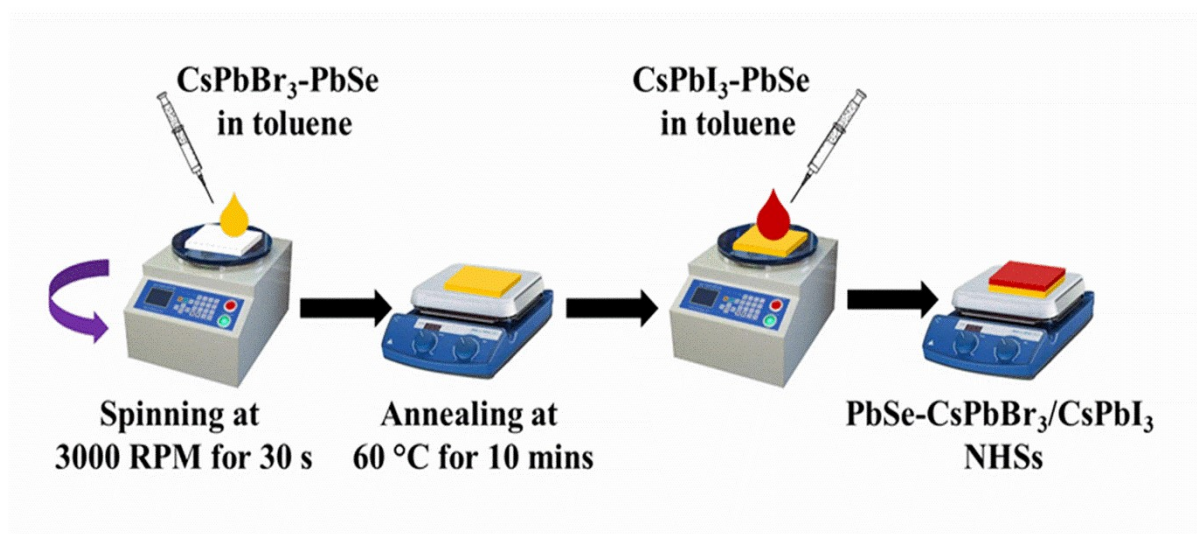

**Figure S3.** Schematic illustrating the sequential deposition of two perovskite layers on a glass substrate using spin coater.

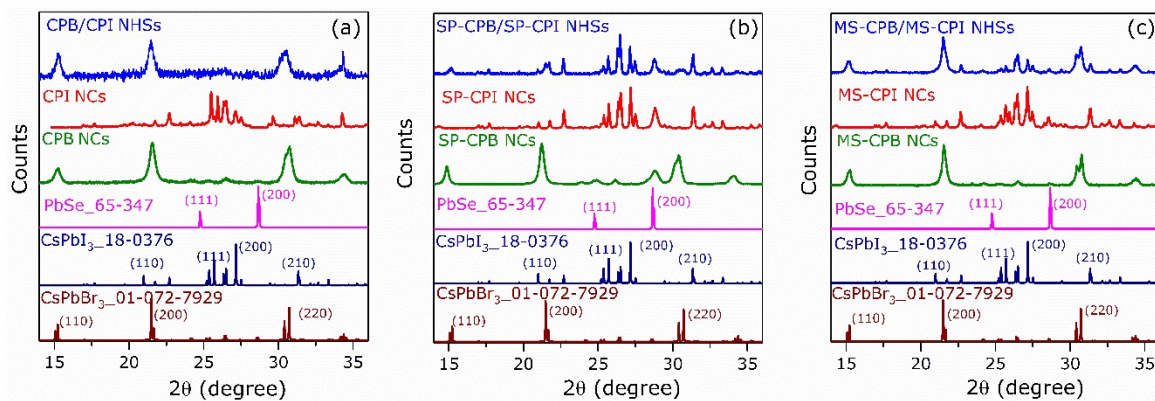

**Figure S4.** (a-c) PXRD pattern of pristine CPB, SP/MS-CPB, CPI, SP/MS-CPI and their corresponding heterostructures along with their reference pattern.

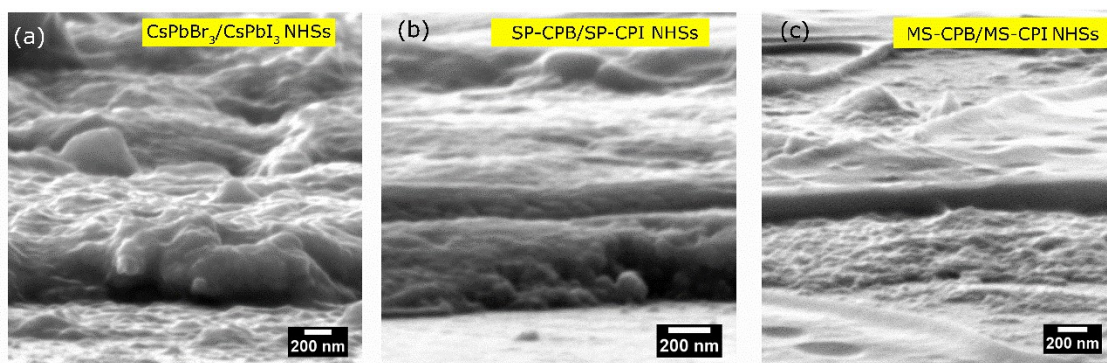

**Figure S5.** (a-c) Cross-sectional FESEM image of CPB/CPI NHSs, SP-CPB/SP-CPI NHSs, and MS-CPB/MS-CPI NHSs, respectively.

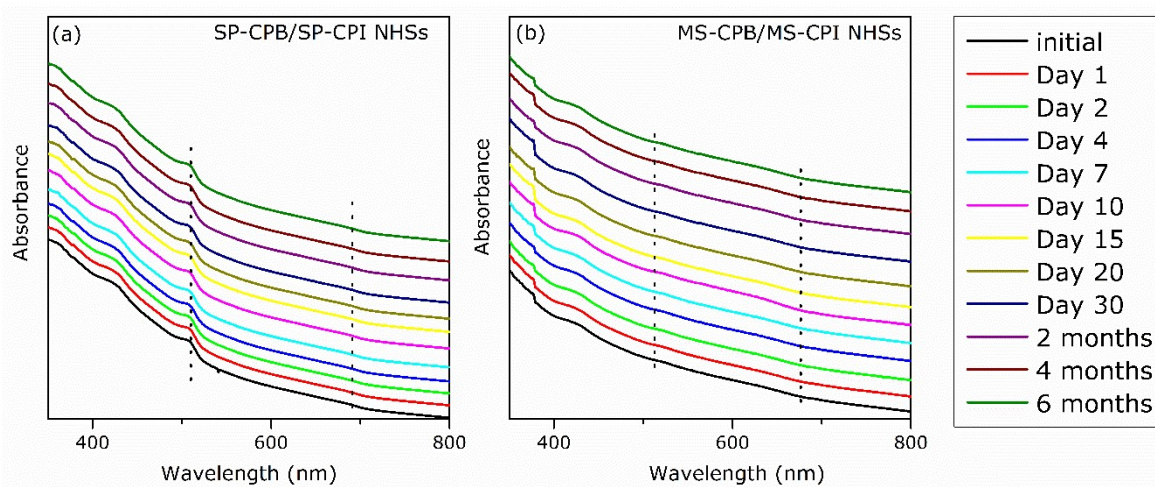

**Figure S6.** (a), (b) Absorption Spectra of SP-CPB/SP-CPI and MS-CPB/MS-CPI NHSs over

the course of six months, showing no evidence of halide intermixing, whereas the control sample is completely mixed almost instantaneously.

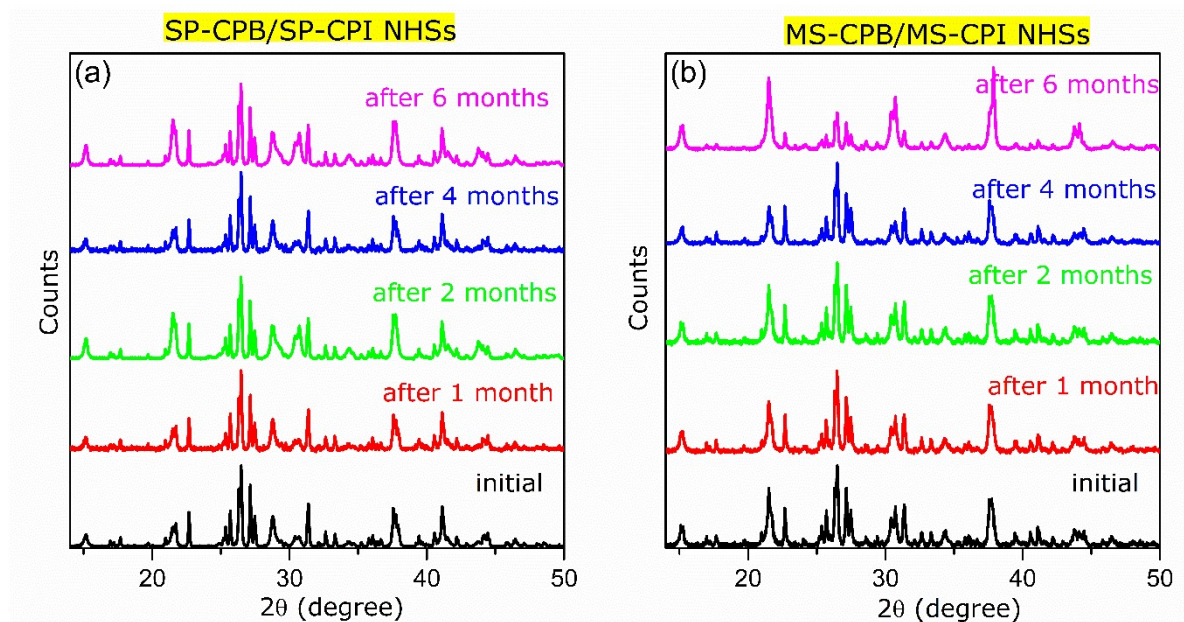

**Figure S7.** (a), (b) PXRD pattern of SP-CPB/SP-CPI and MS-CPB/MS-CPI NHSs collected for a span of six months. The PXRD pattern corresponding to NHSs is stable for even after six months, which shows the highly crystalline stability of the NHSs.

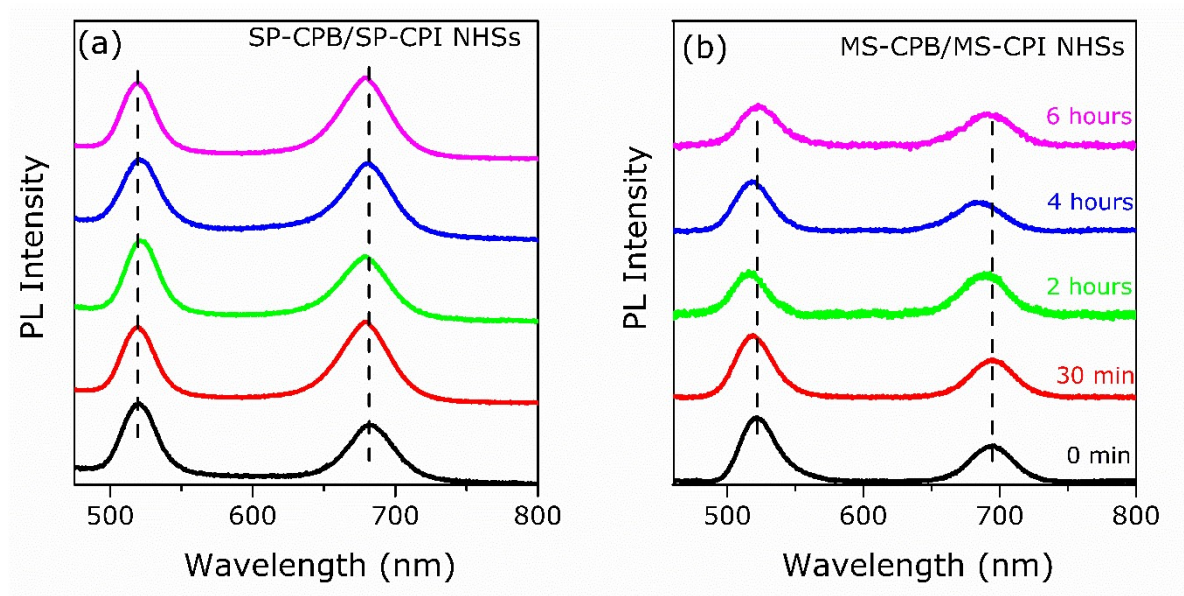

**Figure S8.** Evolution of emission spectra with time upon heating at 100 °C **(a)** SP-CPB/SP-CPI NHSs; **(b)** MS-CPB/MS-CPI NHSs.

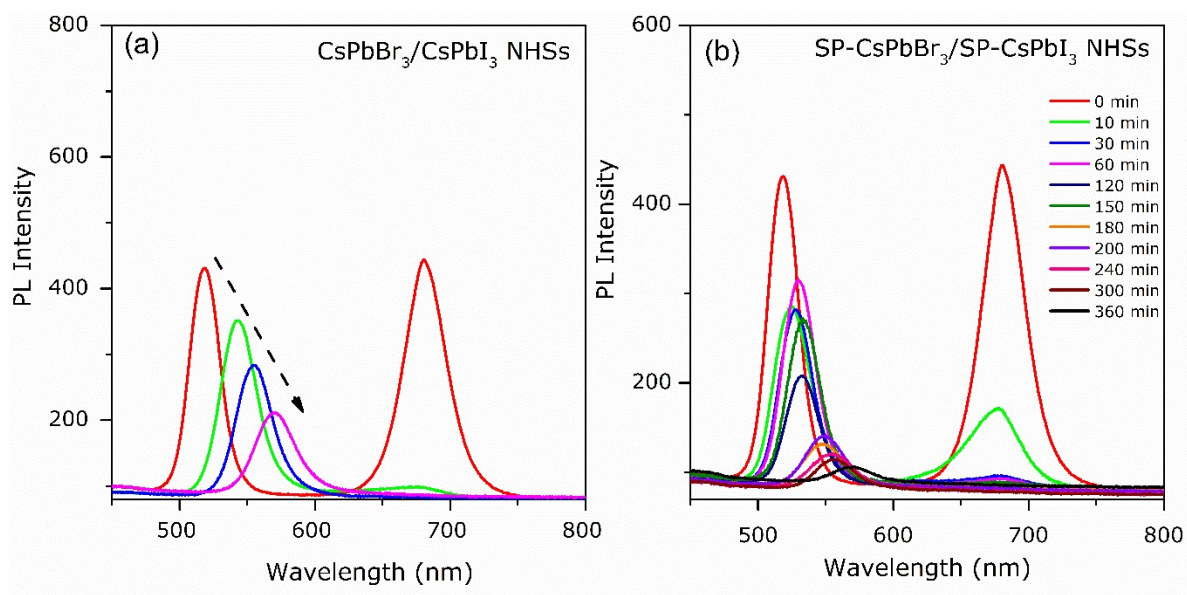

**Figure S9.** Change in the PL emission spectra of **(a)** pristine CsPbBr<sub>3</sub>/CsPbI<sub>3</sub> NHSs in toluene; **(b)** SP-CsPbBr<sub>3</sub>/SP-CsPbI<sub>3</sub> NHSs in toluene.
